# Supplementary material for: Waning Humoral Response after COVID-19 mRNA Vaccination in Maintenance Dialysis Patients and Recovery after a Complementary Third Dose
Source: MDPI journal article supplement (doi:10.3390/vaccines10030433), 2022-03-11
Supplement: s1 [file s1]

**Figure S1:** Comparison of anti-S IgG titer after 3<sup>rd</sup> dose between IN-D vs. PI-D adjusted to sex, age, BMI, CCI. Multivariable analysis (ANCOVA p-value for the model <0.01). Continuous variables are square root transformed.

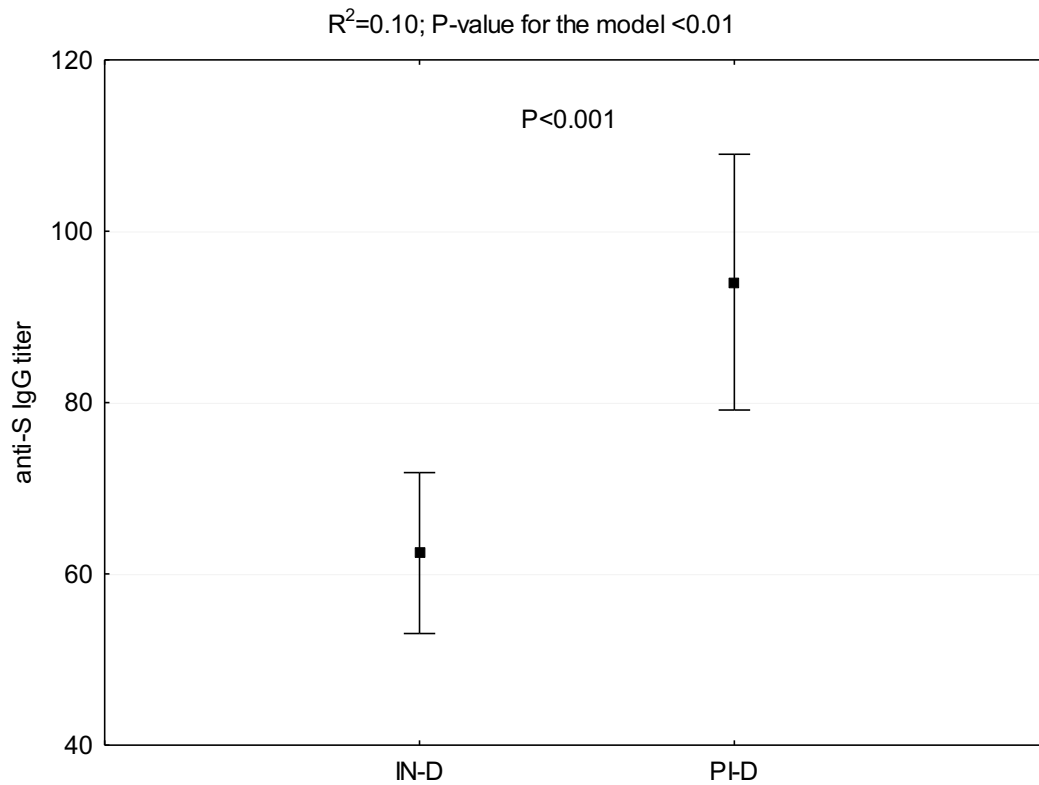

|                    | (β)          | SE (β)      | lower 95%CI  | upper 95%CI  | p-value          |
|--------------------|--------------|-------------|--------------|--------------|------------------|
| Intercept          |              |             |              |              | 0.14             |
| Age                | 0.06         | 0.08        | -0.10        | 0.22         | 0.46             |
| BMI                | -0.07        | 0.11        | -0.30        | 0.15         | 0.52             |
| CCI<5              | -0.05        | 0.11        | -0.28        | 0.17         | 0.64             |
| Sex (F)            | -0.05        | 0.08        | -0.22        | 0.11         | 0.52             |
| Study group (IN-D) | <b>-0.33</b> | <b>0.08</b> | <b>-0.49</b> | <b>-0.16</b> | <b>&lt;0.001</b> |
